# Supplementary material
Source: Elsevier journal article supplement (https://rcastoragev2.blob.core.windows.net/52268eca70349deb58e56d88224fe093/mmc1.pdf)
Supplement: mmc1 [file mmc1.pdf]

# THE LANCET

## Child & Adolescent Health

### **Supplementary appendix**

This appendix formed part of the original submission and has been peer reviewed. We post it as supplied by the authors.

Supplement to: Hart AR, Embleton ND, Bradburn M, et al. Accuracy of in-utero MRI to detect fetal brain abnormalities and prognosticate developmental outcome: postnatal follow-up of the MERIDIAN cohort. *Lancet Child Adolesc Health* 2019; published online Nov 27. [https://doi.org/10.1016/S2352-4642\(19\)30349-9](https://doi.org/10.1016/S2352-4642(19)30349-9).

## Table of Contents

|                                                                                                                                                                                                              |   |
|--------------------------------------------------------------------------------------------------------------------------------------------------------------------------------------------------------------|---|
| Supplementary table 1: Participant characteristics at entry to the MERIDIAN study .....                                                                                                                      | 1 |
| Supplementary table 2: Combinations of developmental assessments performed in participants in project 2 .....                                                                                                | 2 |
| Supplementary Table 3: Participant characteristics and study participation where iuMR was obtained within 2 weeks of USS .....                                                                               | 3 |
| Supplementary table 4: Outcomes of infants based on iuUSS and iuMRI prognosis, specificities, sensitivities, PPV and NPV <i>for all cases including those who had iuMR more than 2 weeks after USS</i> ..... | 4 |
| Supplementary table 5: Comparison of development categories according to BSID3 and ASQ-3 in participants who completed both assessments (n=84).....                                                          | 5 |

**Supplementary table 1: Participant characteristics at entry to the MERIDIAN study**

| Demographic                             |                    | Overall MERIDIAN cohort | Consented to Project 1 and Project 2 | Consented to Project 1 only |
|-----------------------------------------|--------------------|-------------------------|--------------------------------------|-----------------------------|
| Number of participants                  |                    | 829                     | 132                                  | 106                         |
| iuMR Site (%)                           | Sheffield          | 531 (64)                | 84 (64)                              | 78 (74)                     |
|                                         | Birmingham         | 124 (15)                | 23 (17)                              | 21 (20)                     |
|                                         | Newcastle          | 81 (10)                 | 9 (7)                                | 5 (5)                       |
|                                         | Leeds              | 57 (7)                  | 5 (4)                                | 1 (1)                       |
|                                         | Nottingham         | 16 (2)                  | 1 (1)                                | 1 (1)                       |
|                                         | Belfast            | 20 (2)                  | 10 (8)                               | 0 (0·0)                     |
| Maternal Age at approach (Median [IQR]) |                    | 29·00 [24·00, 33·00]    | 31·00 [26·75, 35·00]                 | 30·00 [26·00, 34·00]        |
| Single Pregnancy (%)                    | Multiple           | 44 (5)                  | 5 (4)                                | 12 (11)                     |
|                                         | Single             | 784 (95)                | 127 (96)                             | 94 (89)                     |
| Gestational Age at iuMR (Median [IQR])  |                    | 22·71 [21·43, 26·43]    | 23·21 [21·68, 28·75]                 | 22·64 [21·57, 25·86]        |
| Gestational Age at iuMR                 | <=24 weeks         | 531 (64)                | 80 (61)                              | 70 (66)                     |
|                                         | 24+ weeks          | 298 (36)                | 52 (39)                              | 36 (34)                     |
| Diagnosis on iuMR (%)                   | 1.Ventriculomegaly | 405 (49)                | 76 (58)                              | 60 (57)                     |
|                                         | 2.Corpus callosum  | 149 (18)                | 21 (16)                              | 20 (19)                     |
|                                         | 3.Posterior fossa  | 134 (16)                | 19 (14)                              | 14 (13)                     |
|                                         | 4.Other            | 138 (17)                | 16 (12)                              | 12 (11)                     |
| Outcome of pregnancy (%)                | Death              | 53 (7)                  | 0 (0)                                | 0 (0)                       |
|                                         | Livebirth          | 642 (78)                | 132 (100)                            | 106 (100)                   |
|                                         | Termination        | 124 (15)                | 0 (0)                                | 0 (0)                       |
| MERIDIAN analysis population (%)        | ORD available      | 570 (69)                | 94 (71)                              | 83 (78)                     |
|                                         | ORD Unavailable    | 175 (21)                | 15 (11)                              | 14 (13)                     |
|                                         | Excluded           | 84 (10)                 | 23 (17)                              | 9 (9)                       |

*iuMR = in utero Magnetic Resonance imaging, IQR = Interquartile range, ORD = Outcome reference diagnosis*

**Supplementary table 2: Combinations of developmental assessments performed in participants in project 2**

| Developmental assessments performed | All participants in Project 2 (%)<br>n=190 | Participants in Project 2 who had iuMR within in 2 weeks of USS (%)<br>n=164 |
|-------------------------------------|--------------------------------------------|------------------------------------------------------------------------------|
| ASQ3 only                           | 60 (32)                                    | 154 (34)                                                                     |
| ASQ3 and BSID3                      | 16 (8)                                     | 14 (9)                                                                       |
| ASQ3 and SDQ                        | 31 (16)                                    | 25 (16)                                                                      |
| ASQ3, BSID3 and SDQ                 | 68 (36)                                    | 56 (34)                                                                      |
| BSID3 alone                         | 2 (1)                                      | 2 (1)                                                                        |
| BSID3 and SDQ                       | 2 (1)                                      | 1 (0.6)                                                                      |
| Medical notes only                  | 11 (6)                                     | 10 (6)                                                                       |

*iuMR = in utero Magnetic Resonance imaging, USS = Ultrasonography, BSID3 = Bayley Scales of Infant and Toddler Development 3rd Edition, ASQ3 = Ages and Stages Questionnaire 3rd Edition, SDQ = Strengths and difficulties questionnaire*

**Supplementary Table 3: Participant characteristics and study participation where iuMR was obtained within 2 weeks of USS**

| Prognosis based on neuroimaging | Eligible (n=511)                    |                       |                              |                       | Ineligible (n=234) |                              |                       | Total      |
|---------------------------------|-------------------------------------|-----------------------|------------------------------|-----------------------|--------------------|------------------------------|-----------------------|------------|
|                                 | Diagnosis and development (N=164)** | Diagnosis only (N=43) | No consent/ withdrew (N=286) | Not approached (N=18) | TOP (N=119)        | Fetal or infant death (N=68) | Not approached (N=47) | (N=745)    |
| <b>Prognosis on USS</b>         |                                     |                       |                              |                       |                    |                              |                       |            |
| Normal                          | 8 (40%)                             | 0                     | 5 (25%)                      | 0                     | 3 (15%)            | 2 (10%)                      | 2 (10%)               | 20 (100%)  |
| Favourable (>90%)               | 65 (25%)                            | 26 (10%)              | 123 (47%)                    | 8 (3%)                | 11 (4%)            | 9 (3%)                       | 16 (6%)               | 258 (100%) |
| Intermediate (50-90%)           | 41 (19%)                            | 9 (4%)                | 88 (41%)                     | 4 (1%)                | 41 (19%)           | 17 (8%)                      | 12 (5%)               | 212 (100%) |
| Poor (<50%)                     | 15 (12%)                            | 3 (2%)                | 24 (20%)                     | 4 (3%)                | 41 (34%)           | 27 (22%)                     | 5 (4%)                | 119 (100%) |
| Not Known                       | 35 (25%)                            | 5 (3%)                | 46 (33%)                     | 2 (1%)                | 23 (16%)           | 13 (9%)                      | 12 (8%)               | 136 (100%) |
| <b>Prognosis on MR</b>          |                                     |                       |                              |                       |                    |                              |                       |            |
| Normal                          | 11 (26%)                            | 3 (7%)                | 21 (51%)                     | 2 (4%)                | 1 (2%)             | 1 (2%)                       | 2 (4%)                | 41 (100%)  |
| Favourable (>90%)               | 84 (28%)                            | 27 (9%)               | 148 (50%)                    | 9 (3%)                | 3 (1%)             | 9 (3%)                       | 16 (5%)               | 296 (100%) |
| Intermediate (50-90%)           | 32 (22%)                            | 7 (4%)                | 60 (41%)                     | 5 (3%)                | 15 (10%)           | 16 (11%)                     | 10 (6%)               | 145 (100%) |
| Poor (<50%)                     | 16 (9%)                             | 4 (2%)                | 35 (19%)                     | 1 (0%)                | 83 (46%)           | 31 (17%)                     | 7 (3%)                | 177 (100%) |
| Not Known                       | 13 (23%)                            | 0                     | 16 (28%)                     | 0                     | 11 (19%)           | 8 (14%)                      | 8 (14%)               | 56 (100%)  |
| No prognosis given              | 8 (26%)                             | 2 (6%)                | 6 (20%)                      | 1 (3%)                | 6 (20%)            | 3 (10%)                      | 4 (13%)               | 30 (100%)  |

*iuMR* = *in utero* Magnetic Resonance imaging, *USS* = *Ultrasonography*, *TOP* = *Termination of pregnancy*

\*Figures relate to the primary population of 745 participants whose in-utero USS and MR scans were performed within 14 days

\*\* One participant completed the ASQ-3 but did not consent to Project 1 but has been included in this column for simplicity

**Supplementary table 4: Outcomes of infants based on iuUSS and iuMRI prognosis, specificities, sensitivities, PPV and NPV for all cases including those who had iuMR more than 2 weeks after USS**

| Prognosis *                                                                                  | Developmental assessment (surviving infants) |                                            | In-utero demise, stillbirth or infant death (N=75) |
|----------------------------------------------------------------------------------------------|----------------------------------------------|--------------------------------------------|----------------------------------------------------|
|                                                                                              | Normal/at risk (N=132)                       | Abnormal (N=58)                            |                                                    |
| <b>USS</b>                                                                                   |                                              |                                            |                                                    |
| Normal or Favourable ( $\leq 10\%$ )<br>Specificity (95% CI)<br>NPV (surviving infants only) | 67<br>51% (42% to 59%)<br>79% (69% to 86%)   | 18                                         | 12                                                 |
| Intermediate (11-50%)                                                                        | 35                                           | 14                                         | 17                                                 |
| Poor ( $>50\%$ )<br>Sensitivity (95% CI)<br>PPV (surviving infants only)                     | 5                                            | 11<br>19% (11% to 31%)<br>69% (44% to 86%) | 29<br>39% (28% to 50%)                             |
| Unknown                                                                                      | 25                                           | 15                                         | 17                                                 |
| <b>iuMR</b>                                                                                  |                                              |                                            |                                                    |
| Normal or Favourable ( $\leq 10\%$ )<br>Specificity (95% CI)<br>NPV (surviving infants only) | 88<br>67% (58% to 74%)<br>81% (72% to 87%)   | 21                                         | 11                                                 |
| Intermediate (11-50%)                                                                        | 21                                           | 15                                         | 18                                                 |
| Poor ( $>50\%$ )<br>Sensitivity (95% CI)<br>PPV (surviving infants only)                     | 5                                            | 13<br>22% (14% to 35%)<br>72% (49% to 88%) | 36<br>48% (37% to 59%)                             |
| Unknown                                                                                      | 11                                           | 5                                          | 10                                                 |

*iuMR = in utero Magnetic Resonance imaging, iuUSS = in utero Ultrasonography, PPV = Positive predictive values, NPV = Negative predictive values, CI = Confidence interval*

\* Prognosis following in-utero scan (chance of abnormal development as assigned by clinician)

**Supplementary table 5: Comparison of development categories according to BSID3 and ASQ-3 in participants who completed both assessments (n=84)**

|       |            | BSID3    |            |        |       |
|-------|------------|----------|------------|--------|-------|
|       |            | Abnormal | Borderline | Normal | Total |
| ASQ-3 | Abnormal   | 17       | 7          | 1      | 25    |
|       | Borderline | 2        | 2          | 8      | 12    |
|       | Normal     | 0        | 3          | 44     | 47    |
|       | Total      | 19       | 12         | 53     | 84    |

*BSID3 = Bayley Scales of Infant and Toddler Development 3rd Edition, ASQ3 = Ages and Stages Questionnaire 3rd Edition*

Sensitivity of 90% (95% CI: 67, 99%), specificity of 83% (95% CI: 70, 92%), PPV 68%, NPV 97%
